# Supplementary material for: Scaling of graphene integrated circuits
Source: Royal Society of Chemistry journal article supplement (doi:10.1039/c5nr01126d), 2015-01-01
Supplement: c5nr01126d1.pdf [file c5nr01126d1.pdf]

# Scaling of Sub-Micron Graphene Integrated Circuits

## Electronic Supplementary Information

Massimiliano Bianchi,<sup>a</sup> Erica Guerriero,<sup>a</sup> Marco Fiocco,<sup>a</sup> Ruggero Alberti,<sup>a</sup> Laura Polloni,<sup>a</sup> Ashkan Behnam,<sup>b</sup> Enrique A. Carrion,<sup>b</sup> Eric Pop,<sup>c</sup> and Roman Sordan<sup>\*a</sup>

Received Xth XXXXXXXXXX 20XX, Accepted Xth XXXXXXXXXX 20XX

First published on the web Xth XXXXXXXXXX 200X

DOI: 10.1039/b000000x

**Cutoff frequency.** The most commonly used transistor performance metric is the cutoff frequency  $f_T$ ; the intrinsic  $f_T$  can be very large in graphene FETs ( $f_T \sim 400$  GHz)<sup>1,2</sup> due to large mobility in graphene, and compares favorably to that of conventional FETs.<sup>3</sup> The cutoff frequency was also found to scale as  $f_T \propto L^{-1}$  similar to conventional semiconductor FETs.<sup>1,3</sup> However, the cutoff frequency is a measure of the internal transistor transit time rather than transistor functionality at high-frequencies. This is because the cutoff frequency is obtained from the small-signal current gain measured in a circuit in which the gate is driven by a current source while the output (between the source and drain) is shorted.<sup>4</sup> Use of an input current source makes the cutoff frequency independent of the gate resistance which is one of the main limiting factors affecting high-frequency response of FETs. Similarly, the short circuit between source and drain shorts the output conductance (in the absence of the parasitic source/drain series resistances) and therefore makes the cutoff frequency independent of the extent of the drain current saturation (shorted output also does not have any practical relevance).

**Maximum frequency of oscillation.** A more realistic figure of merit is the maximum frequency of oscillation  $f_{\max}$  which represents the frequency at which the Mason's unilateral power gain<sup>5</sup> falls to unity. Since the power gain is obtained from a circuit in which the impedance of the input voltage source and the load impedance are finite,<sup>4</sup> both the gate resistance and output conductance influence the power gain and therefore  $f_{\max}$ . For this reason graphene FETs exhibit much smaller  $f_{\max}$  than other types of transistors, typically  $\sim 50$  GHz.<sup>6</sup> By comparison,  $f_{\max} > 1$  THz has been obtained both in InP high electron mobility transistors<sup>7</sup> and heterojunction bipolar transistors.<sup>8</sup> In addition,  $f_{\max}$  of graphene FETs was found to scale only weakly with the inverse gate length.<sup>3</sup> The maximum frequency of oscillation represents an impor-

tant benchmark because it is an invariant quantity which allows comparison of different transistor technologies and accounts for real signal amplification.<sup>5</sup> However, it suffers from the requirements for device unilateralization and impedance matching which cannot be performed in realistic circuits.

**Intrinsic gate delay.** The typical figure of merit in a large-signal regime is the intrinsic gate delay  $CV/I$  which represents the time required to increase the voltage of the gate capacitor  $C_G$  by the large-signal output voltage swing  $\Delta V$  when charged by a constant drain current  $I_D$ .<sup>9</sup>

## References

- 1 Y. Wu, K. A. Jenkins, A. Valdes-Garcia, D. B. Farmer, Y. Zhu, A. A. Bol, C. Dimitrakopoulos, W. Zhu, F. Xia, P. Avouris and Y.-M. Lin, *Nano Lett.*, 2012, **12**, 3062–3067.
- 2 R. Cheng, J. Bai, L. Liao, H. Zhou, Y. Chen, L. Liu, Y.-C. Lin, S. Jiang, Y. Huang and X. Duan, *Proc. Natl. Acad. Sci. USA*, 2012, **109**, 11588–11592.
- 3 F. Schwierz, *Proc. IEEE*, 2013, **101**, 1567–1584.
- 4 F. Schwierz, H. Wong and J. J. Liou, *Nanometer CMOS*, Pan Stanford Publishing, Singapore, 2010.
- 5 S. Mason, *T. IRE Prof. Group Circ. Theory*, 1954, **CT-1**, 20–25.
- 6 Z. Guo, R. Dong, P. S. Chakraborty, N. Lourenco, J. Palmer, Y. Hu, M. Ruan, J. Hankinson, J. Kunc, J. D. Cressler, C. Berger and W. A. de Heer, *Nano Lett.*, 2013, **13**, 942–947.
- 7 R. Lai, X. Mei, W. Deal, W. Yoshida, Y. M. Kim, P. H. Liu, J. Lee, J. Uyeda, V. Radisic, M. Lange, T. Gaier, L. Samoska and A. Fung, *Int. El. Devices Meet.*, 2007, pp. 609–611.
- 8 J. Hacker, M. Urteaga, M. Seo, A. Sklare and R. Lin, *Proc. IEEE MTT-S Int. Microwave Symp.*, 2013, pp. 1–3.
- 9 R. Chau, S. Datta, M. Doczy, B. Doyle, B. Jin, J. Kavalieros, A. Majumdar, M. Metz and M. Radosavljevic, *IEEE T. Nanotechnol.*, 2005, **4**, 153–158.

<sup>a</sup> L-NESS, Department of Physics, Politecnico di Milano, Polo di Como, Via Anzani 42, 22100 Como, Italy. E-mail: roman.sordan@polimi.it

<sup>b</sup> Electrical & Computer Engineering, University Illinois Urbana-Champaign, Urbana IL 61801, USA.

<sup>c</sup> Electrical Engineering, Stanford University, Stanford, CA 94305, USA.
